# Supplementary material for: Development of the Preterm Gut Microbiome in Twins at Risk of Necrotising Enterocolitis and Sepsis
Source: PLoS One. 2013 Aug 30;8(8):e73465. doi: 10.1371/journal.pone.0073465 (PMC3758342; doi:10.1371/journal.pone.0073465)
Supplement: Table S1 — DGGE band identities and prevalence. (XLSX) [file pone.0073465.s003.xlsx]

## Sheet: Sheet1
OTU	Closest Match	Prevalence
4	Enterobacter	127
23	Enterococcus	67
45	Enterococcus	57
25	Propionibacterium	57
40	Enterobacter	48
24	Enterococcus	43
66	Enterococcus	32
74	Enterococcus	29
1	Enterococcus	28
60	Enterococcus	25
55	Klebsiella	20
9	Enterobacter	20
7	Enterococcus	17
54	Actinomyces	16
77	Corynebacterium	10
6	Enterobacter	9
10	Corynebacterium	6
